# Supplementary material for: The Laminin Response in Inflammatory Bowel Disease: Protection or Malignancy?
Source: PubMed Central journal article supplement (PMC4210184; doi:10.1371/journal.pone.0111336), 2014-10-27
Supplement: pone.0111336.s010.pdf [file pone.0111336.s010.pdf]

| specificities       | host              | antibody name    | source                                     | dilution                                   | purpose  |
|---------------------|-------------------|------------------|--------------------------------------------|--------------------------------------------|----------|
| Laminin $\alpha$ 1  | rabbit anti-human | $\alpha$ 1 G4/G5 | Dr D Gullberg                              | 1/400                                      | IF       |
| Laminin $\alpha$ 1  | rat anti-mouse    | 200              | Dr L Sorokin                               | 1/100                                      | IF       |
| Laminin $\alpha$ 2  | mouse anti-human  | 2D10/E7          | Dr E Engvall                               | 1/50                                       | IF       |
| Laminin $\alpha$ 3  | mouse anti-human  | BM2              | Dr P Rousselle                             | 1/100                                      | IF       |
| Laminin $\alpha$ 4  | mouse anti-human  | 3D12             | Dr L Sorokin                               | pure                                       | IF       |
| Laminin $\alpha$ 5  | mouse anti-human  | 4C7              | Dr E Engvall                               | 1/100                                      | IF       |
| Laminin $\alpha$ 5  | rabbit anti-mouse | 405              | Dr L Sorokin                               | 1/500                                      | IF       |
| Laminin $\beta$ 1   | mouse anti-human  | IID9             | Dr L Sorokin                               | pure                                       | IF       |
| Laminin $\beta$ 2   | mouse anti-human  | 9F8              | Dr L Sorokin                               | pure                                       | IF       |
| Laminin $\gamma$ 1  | mouse anti-human  | IID10            | Dr L Sorokin                               | pure                                       | IF       |
| Laminin $\gamma$ 2  | rabbit anti-human | 2140             | Dr P Simon-Assmann                         | 1/1000                                     | IF       |
| Integrin $\alpha$ 6 | rat               | GoH3             | Immunotech                                 | 1/50                                       | IF       |
| Integrin $\beta$ 4  | mouse             | 1964-3E1         | Euromedex                                  | 1/1000                                     | IF       |
| Integrin $\beta$ 1  | mouse anti-human  | P4C10            | Gibco BRL                                  | 1/1000                                     | IF       |
| TNC                 | rabbit            | TNC 1.2          | Dr G Orend                                 | 1/200                                      | IF       |
| FN                  | rabbit            | FN 2.1           | Dr G Orend                                 | 1/200                                      | IF       |
| MUC2                | rabbit anti-human | 1A + 2B MUC2     | Dr J Bara                                  | 1/200                                      | IHC      |
| MUC2                | rabbit anti-mouse | sc-15334         | Santa Cruz Biotechnology                   | 1/1000                                     | IF       |
| MUC5AC              | mouse             | PM9              | Dr J Bara                                  | pure                                       | IHC      |
| MUC6                | mouse             | F8               | Dr J Bara                                  | pure                                       | IHC      |
| TFF1                | mouse             | P2802            | Dr C Tomasetto                             | 1/100                                      | IF       |
| TFF3                | rabbit            | 1519             | Dr C Tomasetto                             | 1/500                                      | IF       |
| Cdx2                | mouse             | CDX2-88          | BioGenex                                   | 1/500                                      | IHC      |
| p53                 | mouse anti-human  | DO-7             | Dako                                       | 1/200                                      | IHC V    |
| p53                 | rabbit anti-mouse | CM5              | Novocastra                                 | 1/100                                      | IF       |
| p53                 | mouse             | DO-1             | Santa Cruz Biotechnology                   | 1 $\mu$ g/10 <sup>6</sup> $\phi$           | IP       |
| p53                 | mouse             | PAb 1801         | BD Pharmingen                              | 1 $\mu$ g/10 <sup>6</sup> $\phi$<br>1/1000 | IP<br>WB |
| Actin               | mouse             | C4               | Chemicon                                   | 1/30000                                    | WB       |
| Mdm2                | mouse anti-human  | IF2              | Invitrogen                                 | 1/500                                      | IHC      |
| Bcl-2               | mouse             | clone 124        | Dako                                       | 1/100                                      | IHC V    |
| E-cadherin          | mouse             | clone 36         | BD Transduction Laboratories <sup>TM</sup> | 1/1000                                     | IF       |
| $\beta$ -catenin    | mouse             | clone 14         | BD Transduction Laboratories <sup>TM</sup> | 1/100                                      | IHC      |
| $\alpha$ -SM1       | mouse             | clone 1A4        | Dako                                       | 1/300                                      | IHC V    |
| Msh2                | mouse             | G219-1129        | Ventana                                    | prediluted                                 | IHC V    |
| Mlh1                | mouse             | G168-728         | Ventana                                    | prediluted                                 | IHC V    |
| Ki67                | mouse             | MM1              | Novocastra                                 | 1/200                                      | IHC      |
| TLR4                | rabbit            | CD284            | Imgenex                                    | 1/50                                       | IHC      |
| CD31                | mouse             | MEM-05           | Invitrogen                                 | 1/200                                      | IF       |
| CD45                | mouse             | 2B11+PD7/26      | Dako                                       | 1/100                                      | IHC V    |
| CD68                | mouse             | KP1              | Dako                                       | 1/4000                                     | IHC V    |
| Pdx1                | rabbit            | -                | Dr C Wright                                | 1/2000                                     | IHC      |
| Sox9                | rabbit            | AB5535           | Millipore                                  | 1/1000                                     | IHC      |
| $\gamma$ H2AX       | mouse             | JBW301           | Millipore                                  | 1/100                                      | IHC      |
| 53BP1               | rabbit            | NB100-304        | Novus Biologicals                          | 1/100                                      | IHC      |
| EGFR                | mouse             | 3C6              | Ventana                                    | prediluted                                 | IHC V    |
| CK-19               | rabbit            | E16-L            | DB Biotech                                 | 1/100                                      | IHC      |
| c-myc               | mouse             | 9E10             | Santa Cruz Biotechnology                   | 1/100                                      | IHC      |

**Table S1: Description of the antibodies used**

IF: immunofluorescence; IHC: immunohistochemistry; IHC V: IHC by Ventana; IP: immunoprecipitation; WB: Western blot
