# Supplementary material for: The Laminin Response in Inflammatory Bowel Disease: Protection or Malignancy?
Source: PubMed Central journal article supplement (PMC4210184; doi:10.1371/journal.pone.0111336), 2014-10-27
Supplement: pone.0111336.s011.pdf [file pone.0111336.s011.pdf]

| Gene               | Sequences (5' to 3')            |
|--------------------|---------------------------------|
| <i>Tg-lama1</i>    | GCCTCATTCCGGGGCTGTGTG           |
|                    | AATGTGGTATGGCTGATTATG           |
| <i>Tg-lama5</i>    | CTGATCAATGGGGCCCCTGTCAAC        |
|                    | AATGTGGTATGGCTGATTATG           |
| <i>LAMA1</i>       | GACAGCCCGGTGTCTGCCTTCACG        |
|                    | GTGGCGGTTTTGGGCTCATATGCA        |
| <i>LAMA5</i>       | TCCCCTACTGCGAAGCTG              |
|                    | CCTCAGGAAGGGCAGGAT              |
| <i>LAMA3</i>       | TGCCCATGTCCTCACACTAA            |
|                    | CACGTCTCCCCATTAC                |
| <i>LAMB1</i>       | CCACTGAAAAACATTGGGAATC          |
|                    | TGAGCCATCATTTCTGTAACATC         |
| <i>LAMC1</i>       | CACAGAGGCCAAGAACAAGG            |
|                    | CTGGTGCTGGTGGCATT               |
| <i>TP53</i>        | QuantiTect® primer assay Qiagen |
| <i>TP53</i> site 1 | TGGTGGGATGATAATGAGATATTGTCC     |
|                    | CTGAGGCAGGAGAATTGCTTGAAC        |
| <i>TP53</i> site 2 | GAATGAATGAAGTAGGCACCATTGC       |
|                    | TCAGGTGGTCAGAAGATGGGTAGAG       |
| <i>TP53</i> site 3 | ATCATTTGACATGTGCAAGGCAGAG       |
|                    | CTGAGGCAGGAGAATGGCATGAA         |
| <i>TP53</i> site 4 | AGATGTCCAAGCTGTACCCCATACC       |
|                    | AGGCCTGAGTTCCTGCATTTCTAAC       |
| <i>TP53</i> site 5 | CTATGTGGGTGTCAGGATACGAGGA       |
|                    | TGAAGCAAAGTTTCAGAAACACAGC       |
| <i>TP53</i> site 6 | TGATGCCAGGAACACTACGCTAACAAT     |
|                    | CCAGCTCTCACGTTTACTTGATTGG       |
| <i>TP53</i> intron | CCATCTCGATAACCGCTCCTACTCT       |
|                    | AACTTATAGGGTGGGCCCTGGAGAA       |

**Table S2: Sequences of the primers used for genotyping, RT-qPCR and chromatin immunoprecipitation**
