# Supplementary material for: The Laminin Response in Inflammatory Bowel Disease: Protection or Malignancy?
Source: PubMed Central journal article supplement (PMC4210184; doi:10.1371/journal.pone.0111336), 2014-10-27
Supplement: pone.0111336.s012.pdf [file pone.0111336.s012.pdf]

| marker     | function                                                                                                                          | positivity in UACL                                            | colonic epithelial cells (outside UACL)                             |
|------------|-----------------------------------------------------------------------------------------------------------------------------------|---------------------------------------------------------------|---------------------------------------------------------------------|
| Pdx1       | transcription factor; role in decision of cell fate                                                                               | Supplementary Figure 4                                        | negative (normal and IBD)                                           |
| Sox9       | transcription factor; role in decision of cell fate                                                                               | Supplementary Figure 4                                        | positive in crypts (normal and IBD)                                 |
| β-catenin  | adherens junction protein (membrane)<br>Wnt-stimulated effector (nuclear)                                                         | nuclear staining; Supplementary Figure 4                      | membrane staining (normal and IBD)                                  |
| E-cadherin | epithelial transmembrane glycoprotein                                                                                             | decrease of intercellular staining;<br>Supplementary Figure 4 | membrane staining (normal and IBD)                                  |
| CK-19      | epithelial cytoskeletal protein                                                                                                   | moderate staining; Supplementary Figure 4                     | membrane staining (normal and IBD)                                  |
| p53        | tumor suppressor gene; cell cycle regulator                                                                                       | nuclear staining; Figure 1                                    | rare nuclear staining (normal)<br>scarce nuclear staining (IBD)     |
| 53BP1      | tumor protein p53-binding protein1<br>player in the cellular response to DNA damage                                               | not illustrated                                               | localized to base of the gland (normal); positive (IBD)             |
| Mlh1       | mismatch repair gene                                                                                                              | Supplementary Figure 4                                        | weak and localized to base of the gland (normal);<br>positive (IBD) |
| Msh2       | mismatch repair gene                                                                                                              | Supplementary Figure 4                                        | weak and localized to base of the gland (normal);<br>positive (IBD) |
| c-myc      | oncogene; Wnt target gene; control of DNA replication                                                                             | Supplementary Figure 4                                        | positive in crypts (normal and IBD)                                 |
| MUC5AC     | secreted mucin glycoprotein, expressed in the stomach;<br>described either in reparation or tumorigenesis process<br>in intestine | Supplementary Figure 3 *                                      | negative (normal and IBD)                                           |
| MUC6       | secreted mucin glycoprotein, expressed in stomach and<br>Brunner's glands                                                         | Supplementary Figure 3 *                                      | negative (normal and IBD)                                           |
| TFF1       | protein of the trefoil factor family; expressed in stomach                                                                        | Supplementary Figure 3 *                                      | negative (normal); some positive (IBD)                              |
| marker     | function                                                                                                                          | absence in UACL                                               | colonic epithelial cells (outside UACL)                             |
| MUC2       | secreted mucin glycoprotein; expressed in the intestine                                                                           | Supplementary Figure 3                                        | positive (normal and IBD)                                           |
| TFF3       | protein of the trefoil factor family; expressed in the<br>intestine                                                               | Supplementary Figure 3 **                                     | positive (normal and IBD)                                           |
| Cdx2       | homeobox gene; specific of adult intestine; implicated in<br>colorectal cancer                                                    | Supplementary Figure 3                                        | positive (normal and IBD)                                           |
| bcl2       | anti-apoptotic role                                                                                                               | not illustrated                                               | some positive in crypts (normal and IBD)                            |
| Ki67       | proliferative marker                                                                                                              | Supplementary Figure 4                                        | positive; base of the gland (normal and IBD)                        |
| TUNEL      | apoptosis                                                                                                                         | Supplementary Figure 4                                        | rare desquamating epithelial cells (normal and IBD)                 |
| Mdm2       | regulator of p53                                                                                                                  | not illustrated                                               | rare (normal and IBD)                                               |
| γH2AX      | phosphorylated form of histone H2AX; indicator<br>for DNA damage; recruitment of repair proteins                                  | not illustrated                                               | rare positive cells (normal and IBD)                                |
| EGFR       | EGF receptor, activated in cancer                                                                                                 | not illustrated                                               | expression in colonocytes (normal); sporadic in IBD                 |

\* Proportion of positive cells in UACL is variable according to location

\*\* The loss is variable according to location of UACL

**Table S3: List of the markers examined to characterize the UACL**
